# Supplementary material for: The solid-state chelation synthesis of LiNi1/3Co1/3Mn1/3O2 as a cathode material for lithium-ion batteries
Source: Royal Society of Chemistry journal article supplement (doi:10.1039/c5ta01236h), 2015-01-01
Supplement: c5ta01236h1.pdf [file c5ta01236h1.pdf]

# The solid-state chelation synthesis of $\text{LiNi}_{1/3}\text{Co}_{1/3}\text{Mn}_{1/3}\text{O}_2$ as a cathode material for lithium-ion batteries

Xuyin Jiang,<sup>a,b</sup> Yujing Sha,<sup>a,b</sup> Rui Cai<sup>b</sup> and Zongping Shao<sup>a,c,d</sup>

## Supporting Information

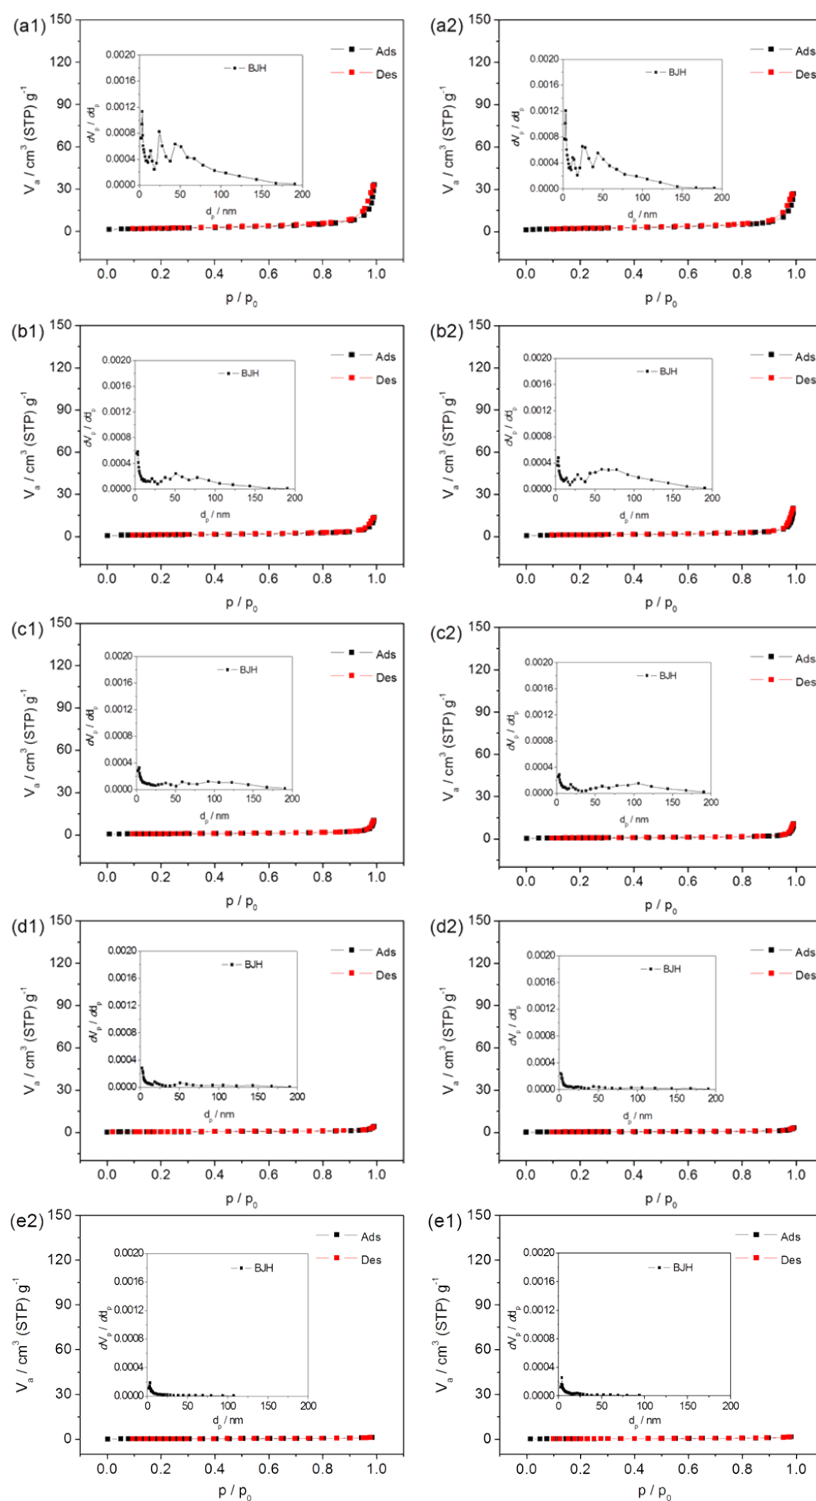

Fig. 15. Adsorption/desorption curves for CA (a1–e1) and CP (a2–e2): (a1) and (a2) 700 °C, (b1) and (b2) 800 °C, (c1) and (c2) 850 °C, (d1) and (d2) 900 °C, (e1) and (e2) 900 °C; The inset images are the corresponding BJH pictures.
